# Supplementary material
Source: PubMed Central journal article supplement (PMC5394654)
Supplement: rspb20162123supp1.pdf [file rspb20162123supp1.pdf]

## Supplementary Information for

### ASTRONOMICAL AND ATMOSPHERIC IMPACTS ON DEEP-SEA HYDROTHERMAL VENT INVERTEBRATES

Yann Lelièvre<sup>1,2\*</sup>, Pierre Legendre<sup>2</sup>, Marjolaine Matabos<sup>1</sup>, Steve Mihály<sup>3</sup>, Claudia P. Arango<sup>4</sup>,  
Raymond W. Lee<sup>5</sup>, Pierre-Marie Sarradin<sup>1</sup>, Jozée Sarrazin<sup>1</sup>

correspondence to: [yann.lelievre@ifremer.fr](mailto:yann.lelievre@ifremer.fr)

**This PDF file includes:**

#### ***Supplementary Figure S1***

**Fig. S1.** Normalized spectra of measured environmental variables with identified periodicity bands. Degrees of freedom used to generate the spectra ranged from 24 to 98 based on the length and resolution of the time series. The spectrum of currents was obtained from the mean of 4 mab and 30 mab data.

#### ***Supplementary Figure S2***

**Fig. S2.** High-resolution bathymetric map of the Grotto active hydrothermal edifice and location of the TEMPO-mini site (black triangle). The 10 m high sulphide structure is located in the Main Endeavour Field vent field (47°56.958'N, 129°5.899'W) on the Juan de Fuca Ridge, northeast Pacific.

#### ***Supplementary Table S1***

**Table S1.** List of instruments used in this study, summarizing the characteristics, the habitat conditions as well as the periods for each variable of interest, and the principal investigators responsible for the instruments.

#### ***Supplementary Video S1***

**Video S1.** Footage of a medium view recorded by the TEMPO-mini ecological observatory module at 2186 m depth on the Grotto vent edifice (Main Endeavour Field). The camera was focused on a *Ridgeia piscesae* assemblage and associated fauna located near a hydrothermal

diffuse area. Emanating hydrothermal fluid that surrounds the community is visible as shimmering water.

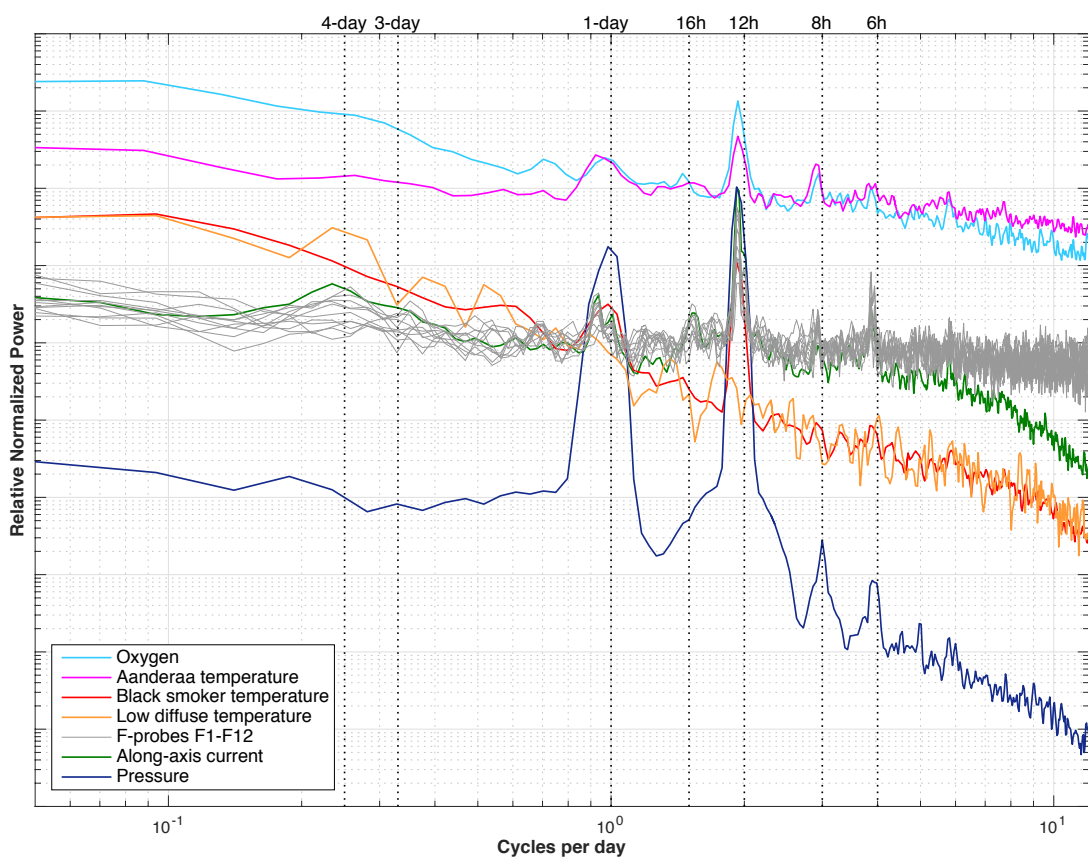

129°5'56"O

129°5'55"O

129°5'54"O

47°56'58"N

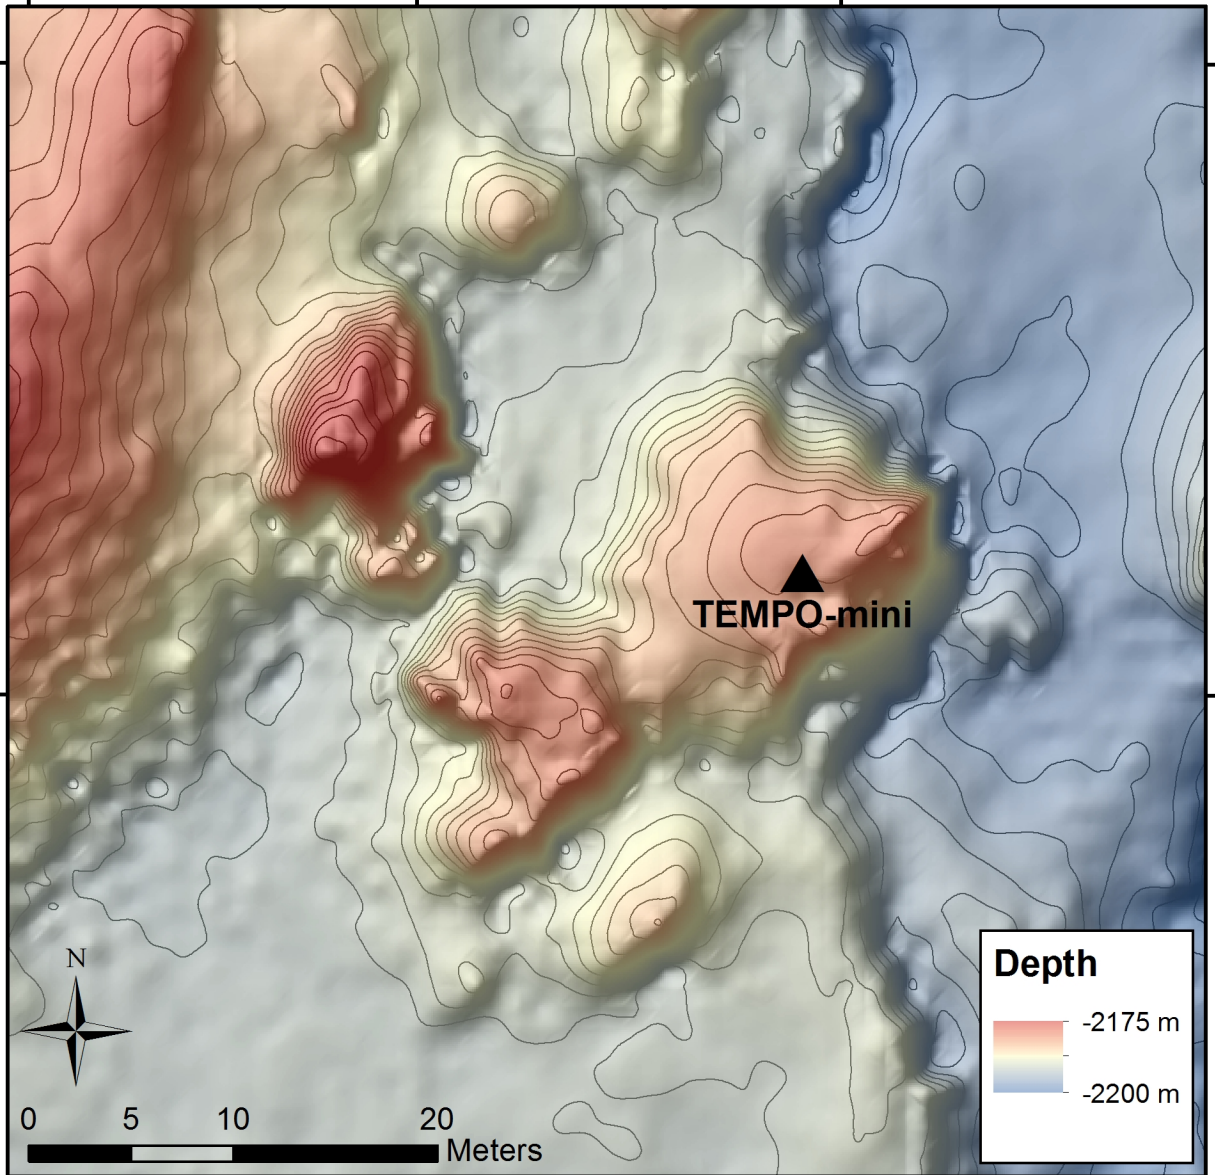

47°56'57"N

**Depth**

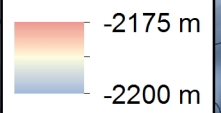

0 5 10 20 Meters

**Table S1.** List of instruments used in this study, summarizing the characteristics, the habitat conditions as well as the periods for each variable of interest, and the principal investigators responsible for the instruments.

| Instruments (units)                                     | Sample interval                        | Acquisition frequency | min-max (mean $\pm$ sd)              | Main periods                 | Principal Investigators |
|---------------------------------------------------------|----------------------------------------|-----------------------|--------------------------------------|------------------------------|-------------------------|
| BPR (bar)<br><i>Bottom Pressure Recorder</i>            | Pressure                               | 1 second              | 220.03-222.69<br>(221.32 $\pm$ 3.78) | 3-4 day<br>12.4 h and 24.8 h | R.Thomson               |
| ADCP (cm/s)<br><i>Acoustic Doppler Current Profiler</i> | Bottom currents                        | 1 second              | 0.00-20.73<br>(4.99 $\pm$ 2.83)      | 3-4 day<br>12.4 h and 24.8 h | S. Mihály               |
| BARS (°C)<br><i>Benthic and Resistivity Sensors</i>     | Temperature<br>black smoker            | 20 seconds            | 330.43-334.7<br>(332.58 $\pm$ 0.64)  | 12.4 h<br>24.8 h             | M. Lilley               |
| RAS (°C)<br><i>Remote Access Water Sampler</i>          | Temperature<br>diffuse flow            | 1 second              | 31.47-74.66<br>(45.71 $\pm$ 5.76)    | 12.4 h<br>24.8 h             | D. Butterfield          |
| F-probes (°C)<br>F1-F12                                 | Temperature<br>Siboglinidae assemblage | 1 hour                | 1.6-13.6<br>(3.9 $\pm$ 0.6)          | 12.4 h<br>24.8 h             | R. Lee                  |
| Andearaa Optode Temperature (°C)                        | Temperature<br>Siboglinidae assemblage | 30 seconds            | 1.93-4.96<br>(2.7 $\pm$ 0.32)        | 12.4 h<br>24.8 h             | P-M. Sarradin           |
| Andearaa Optode Oxygen<br>(% saturation)                | Oxygen<br>Siboglinidae assemblage      | 15 minutes            | 1.53-22.07<br>(11.56 $\pm$ 3.35)     | 12.4 h<br>24.8 h             | P-M. Sarradin           |
